# Supplementary material
Source: PubMed Central journal article supplement (PMC7252899)
Supplement: ac9b05722_si_002.pdf [file ac9b05722_si_002.pdf]

## Simultaneous immunoglobulin A and G glycopeptide profiling for high-throughput applications

Ana Momčilović<sup>1</sup>, Noortje de Haan<sup>1</sup>, Agnes L. Hipgrave Ederveen<sup>1</sup>, Albert Bondt<sup>1</sup>, Carolien A. M. Koeleman<sup>1</sup>, David Falck<sup>1</sup>, Louise A. de Neef<sup>1</sup>, Wilma E. Mesker<sup>2</sup>, Rob Tollenaar<sup>2</sup>, Arnoud de Ru<sup>1</sup>, Peter van Veelen<sup>1</sup>, Manfred Wuhrer<sup>1</sup>, Viktoria Dotz<sup>1</sup>

<sup>1</sup> Center for Proteomics and Metabolomics, Leiden University Medical Center, 2300 RC Leiden, The Netherlands

<sup>2</sup> Department of Surgery, Leiden University Medical Center, 2300 RC Leiden, The Netherlands

### Table of Contents

#### Figure S1: Fragmentation spectra and Byonic software analysis (Page S2-11)

|             |            |
|-------------|------------|
| IgA1 HYT    | (Page S2)  |
| IgA1/2 LAGy | (Page S3)  |
| IgA1/2 LAGc | (Page S4)  |
| IgA1/2 LSL  | (Page S5)  |
| IgA2 TPL    | (Page S6)  |
| J-chain ENI | (Page S7)  |
| J-chain IIV | (Page S8)  |
| IgG1        | (Page S9)  |
| IgG2/3      | (Page S10) |
| IgG4        | (Page S11) |

**Figure S2:** IgG glycosylation profiles and absolute intensities at different capturing conditions (Page S12)

**Figure S3:** Correlation heatmap of IgG1 and LSL glycopeptides (Page S13)

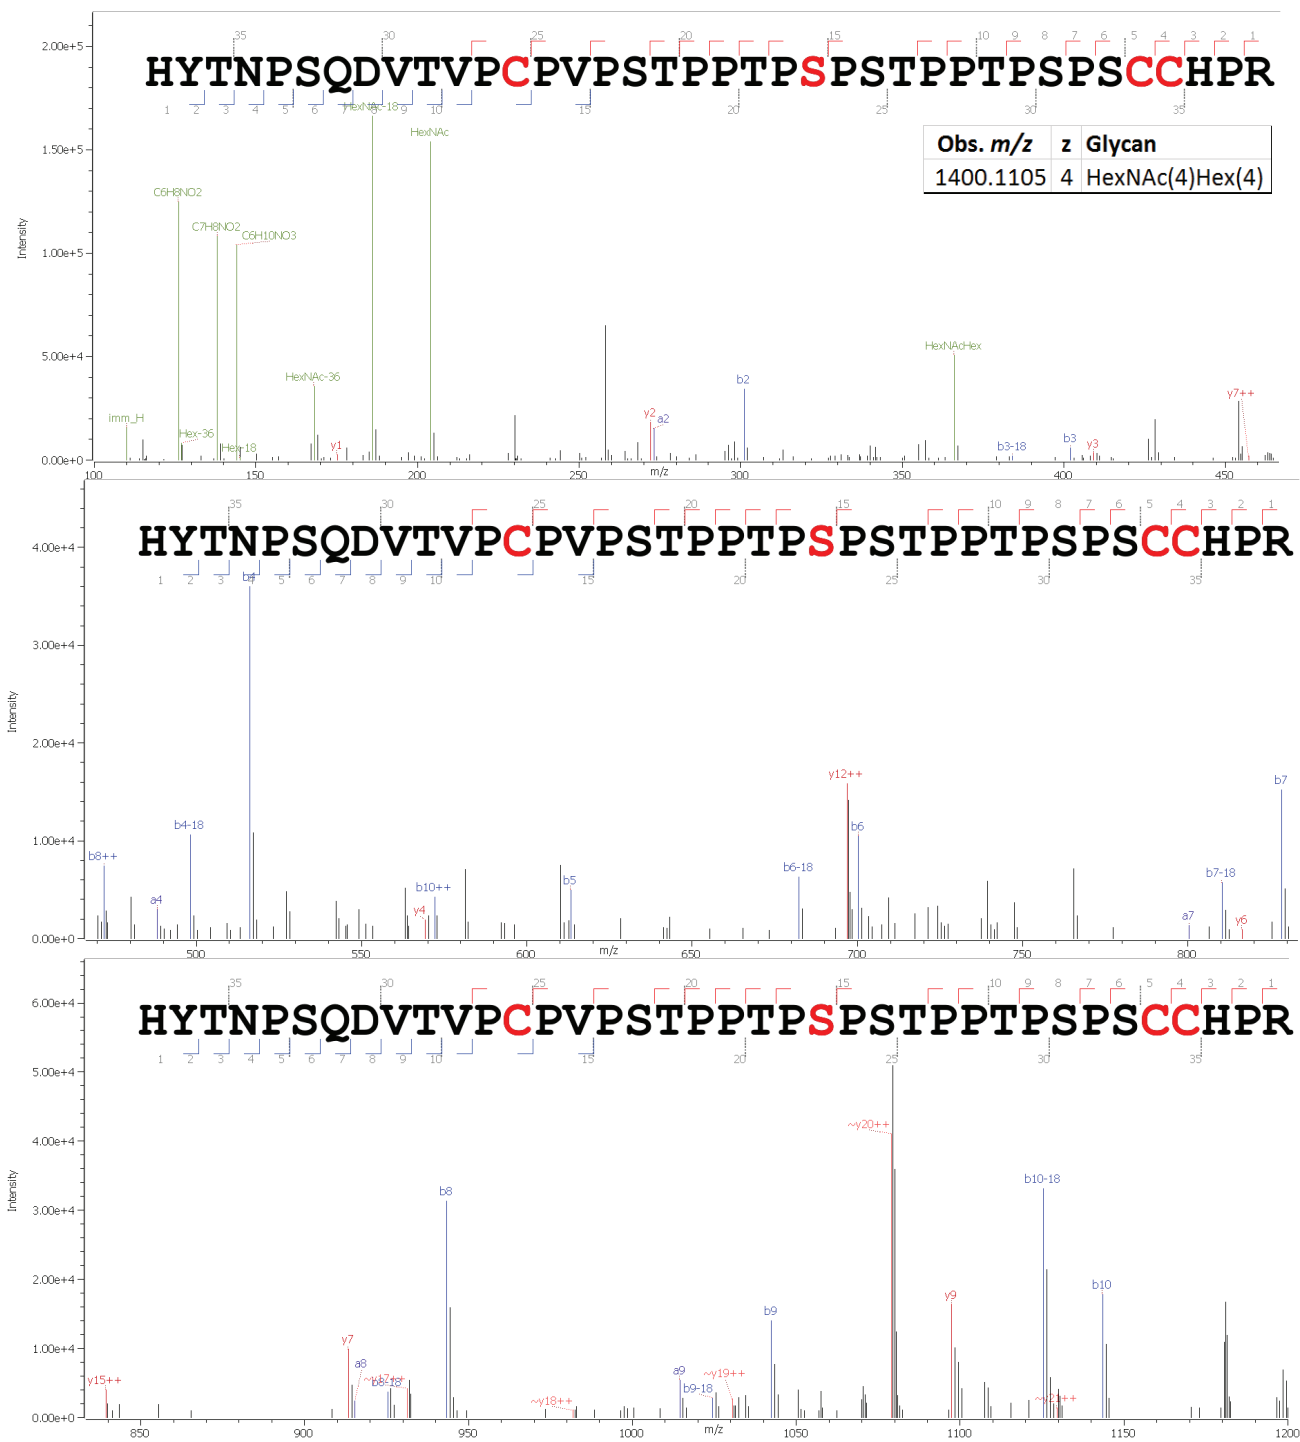

**Figure S1 Fragmentation spectra from HCD-MS/MS and Byonic software analysis**

Fragmentation spectra used for glycopeptide identification with Byonic were automatically annotated by the software. Each page contains one glycopeptide spectrum per cluster, divided in three separate  $m/z$  sections for better visibility; IgA1 HYT (Page 2), IgA1/2 LAGy (Page 3), IgA1/2 LAGc (Page 4), IgA1/2 LSL (Page 5), IgA2 TPL (Page 6), J-chain ENI (Page 7), J-chain IIV (Page 8), IgG1 (Page 9), IgG2/3 (Page 10), IgG4 (Page 11). The IgA2 SES cluster was not identified with this approach. In green are marked glycan-related peaks (Hex = hexose, HexNAc = *N*-acetylhexosamine, NeuAc = *N*-acetylneuraminic acid). The loss of one or two water molecules is marked with -18 and -36, respectively. The right top corner shows the amino acid sequence, with b-ions marked in blue and y-ions in red. Amino acids with modifications are presented in red font. In case of the HYT cluster, only one of the six potential *O*-glycosylation sites is marked red.

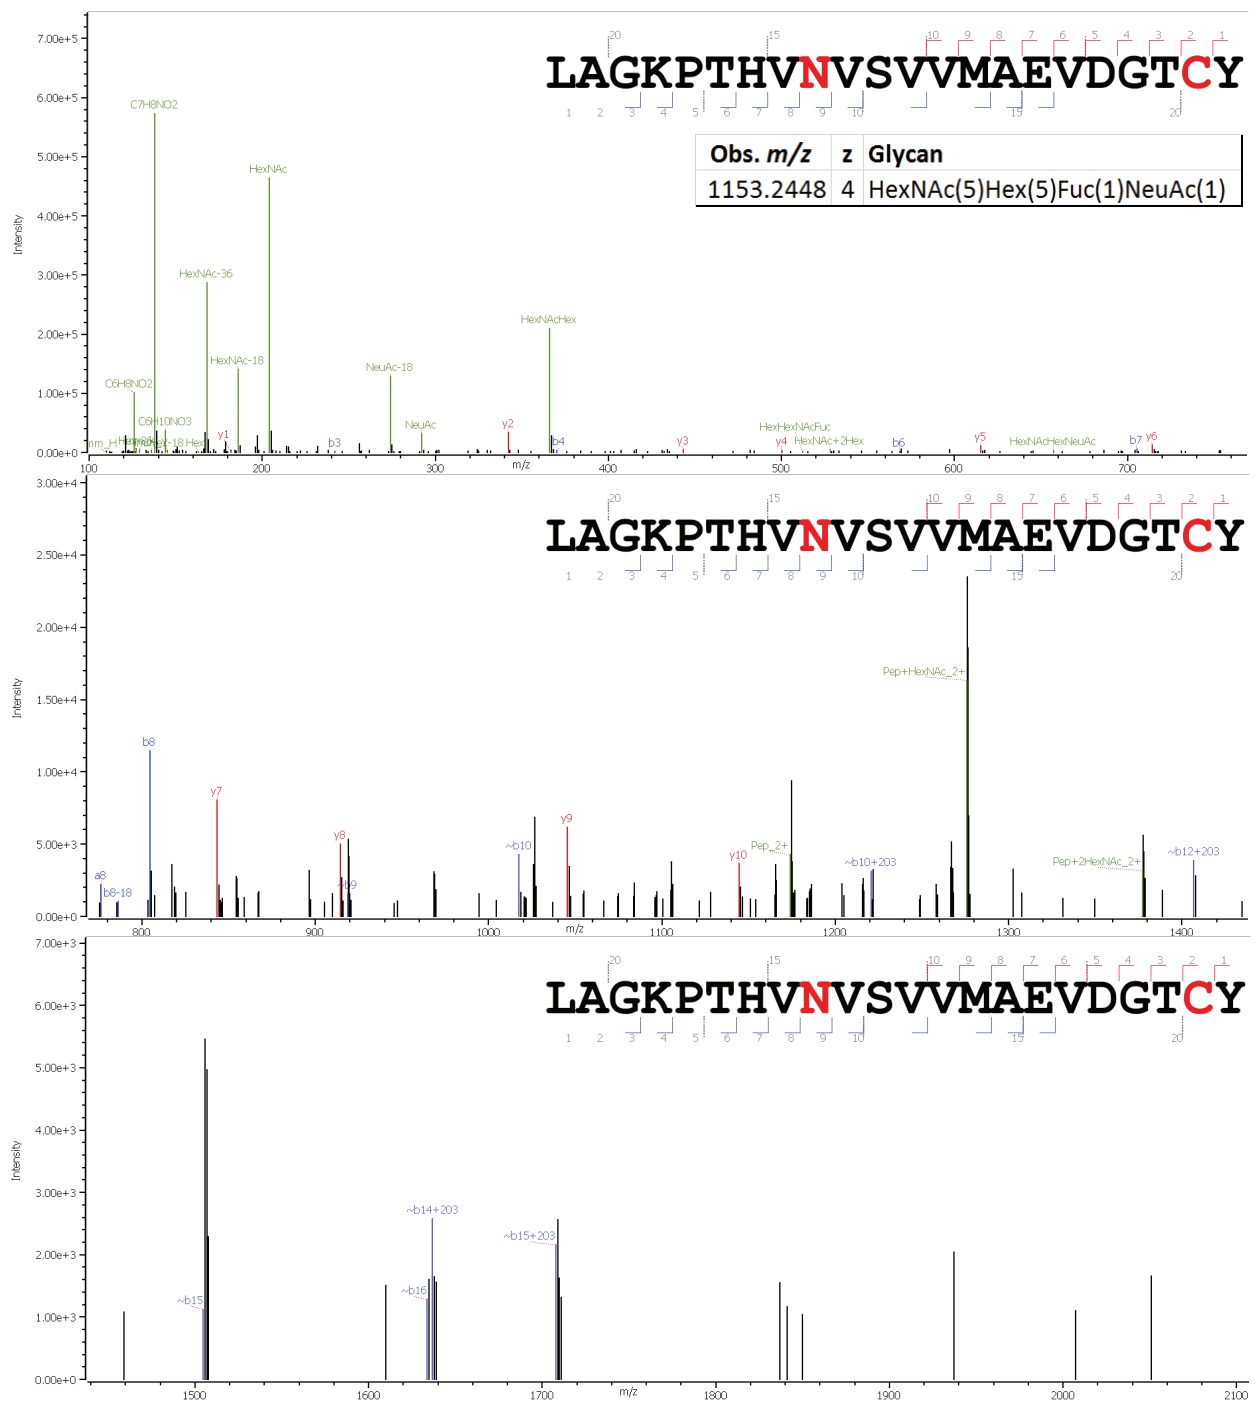

**Figure S1 Fragmentation spectra from HCD-MS/MS and Byonic software analysis**

Fragmentation spectra used for glycopeptide identification with Byonic were automatically annotated by the software. Each page contains one glycopeptide spectrum per cluster, divided in three separate *m/z* sections for better visibility; IgA1 HYT (Page 2), IgA1/2 LAGy (Page 3), IgA1/2 LAGc (Page 4), IgA1/2 LSL (Page 5), IgA2 TPL (Page 6), J-chain ENI (Page 7), J-chain IIV (Page 8), IgG1 (Page 9), IgG2/3 (Page 10), IgG4 (Page 11). The IgA2 SES cluster was not identified with this approach. In green are marked glycan-related peaks (Hex = hexose, HexNAc = *N*-acetylhexosamine, NeuAc = *N*-acetylneuraminic acid). The loss of one or two water molecules is marked with -18 and -36, respectively. The right top corner shows the amino acid sequence, with b-ions marked in blue and  $\gamma$ -ions in red. Amino acids with modifications are presented in red font. In case of the HYT cluster, only one of the six potential *O*-glycosylation sites is marked red.

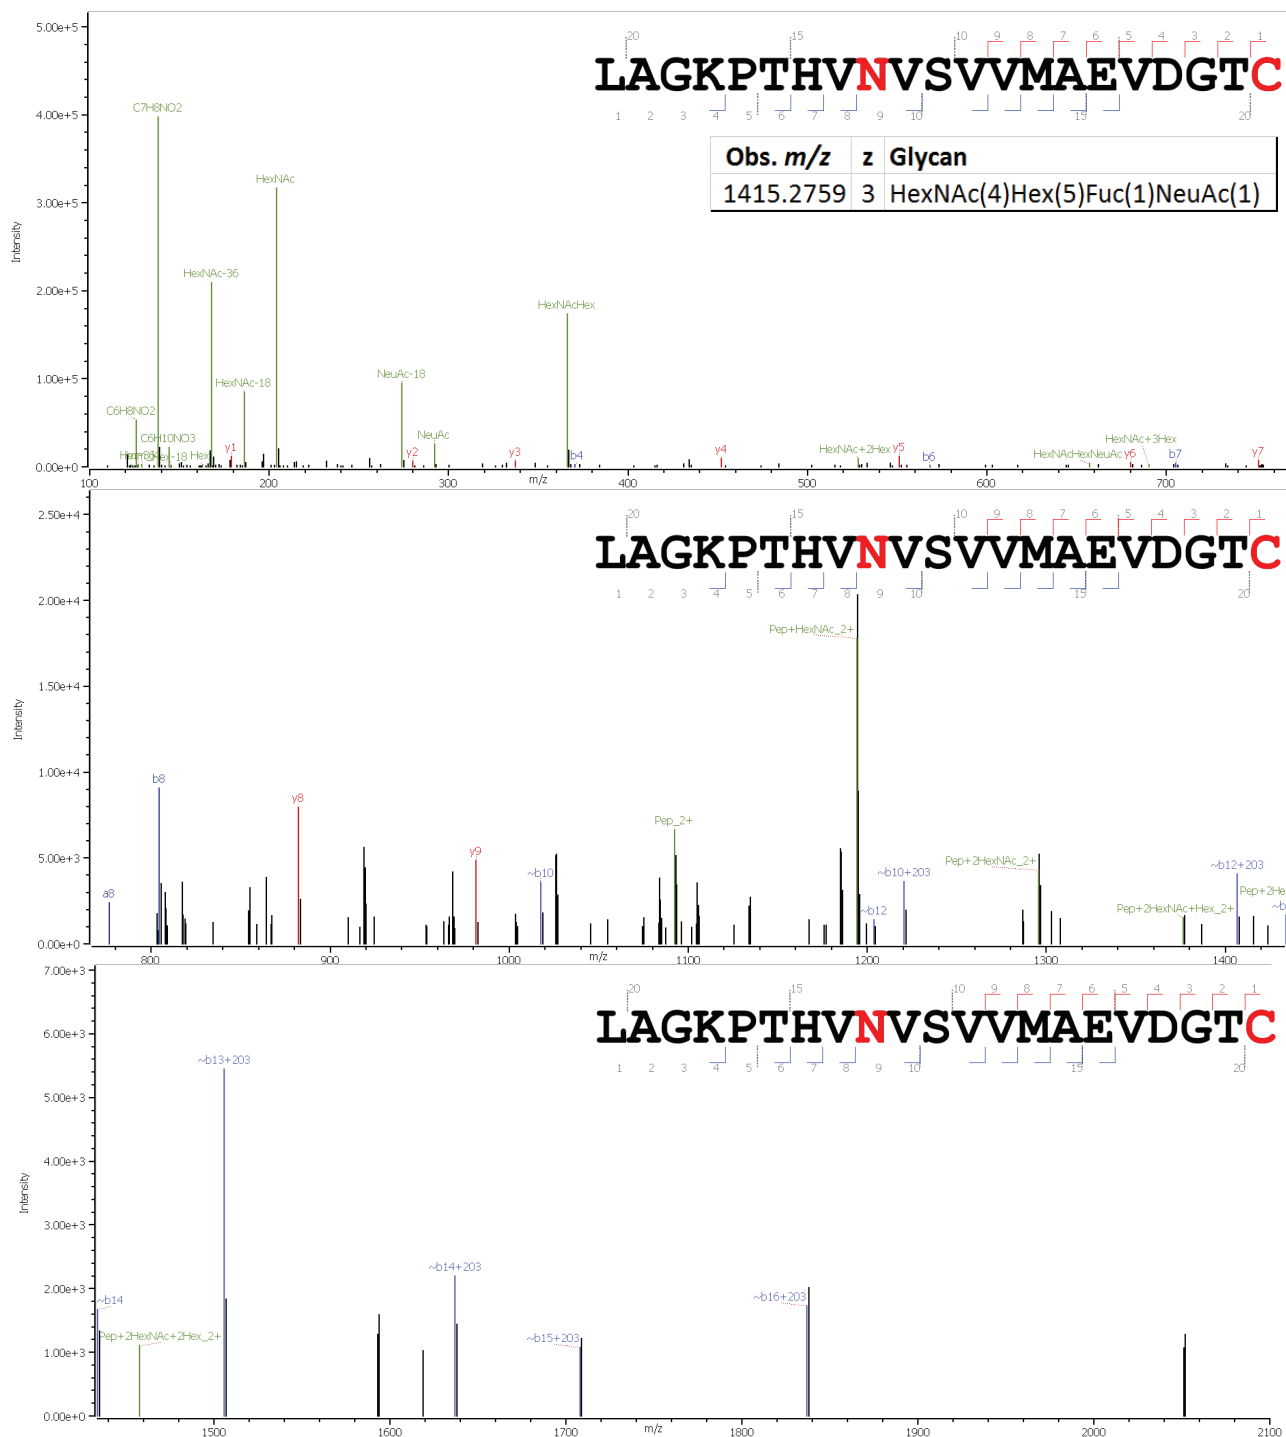

**Figure S1 Fragmentation spectra from HCD-MS/MS and Byonic software analysis**

Fragmentation spectra used for glycopeptide identification with Byonic were automatically annotated by the software. Each page contains one glycopeptide spectrum per cluster, divided in three separate  $m/z$  sections for better visibility; IgA1 HYT (Page 2), IgA1/2 LAGy (Page 3), IgA1/2 LAGc (Page 4), IgA1/2 LSL (Page 5), IgA2 TPL (Page 6), J-chain ENI (Page 7), J-chain IIV (Page 8), IgG1 (Page 9), IgG2/3 (Page 10), IgG4 (Page 11). The IgA2 SES cluster was not identified with this approach. In green are marked glycan-related peaks (Hex = hexose, HexNAc = *N*-acetylhexosamine, NeuAc = *N*-acetylneuraminic acid). The loss of one or two water molecules is marked with -18 and -36, respectively. The right top corner shows the amino acid sequence, with b-ions marked in blue and y-ions in red. Amino acids with modifications are presented in red font. In case of the HYT cluster, only one of the six potential *O*-glycosylation sites is marked red.

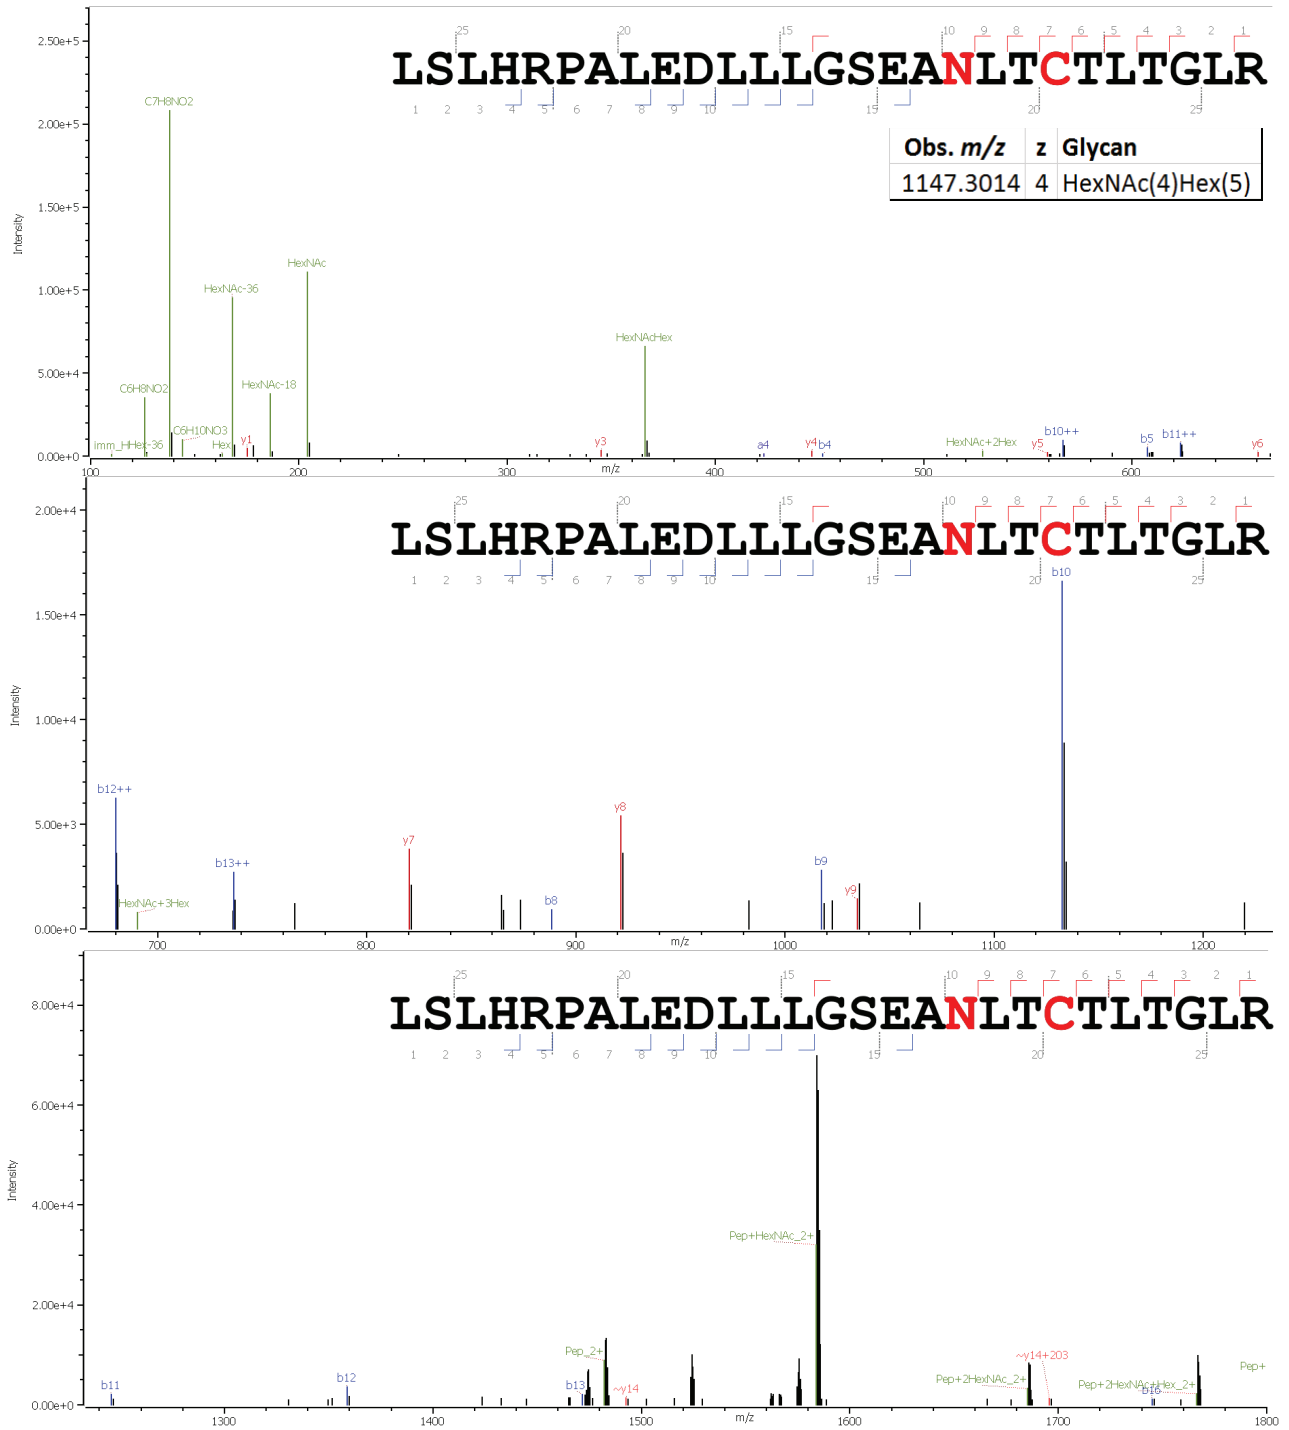

**Figure S1 Fragmentation spectra from HCD-MS/MS and Byonic software analysis**

Fragmentation spectra used for glycopeptide identification with Byonic were automatically annotated by the software. Each page contains one glycopeptide spectrum per cluster, divided in three separate *m/z* sections for better visibility; IgA1 HYT (Page 2), IgA1/2 LAGy (Page 3), IgA1/2 LAGc (Page 4), IgA1/2 LSL (Page 5), IgA2 TPL (Page 6), J-chain ENI (Page 7), J-chain IIV (Page 8), IgG1 (Page 9), IgG2/3 (Page 10), IgG4 (Page 11). The IgA2 SES cluster was not identified with this approach. In green are marked glycan-related peaks (Hex = hexose, HexNAc = *N*-acetylhexosamine, NeuAc = *N*-acetylneuraminic acid). The loss of one or two water molecules is marked with -18 and -36, respectively. The right top corner shows the amino acid sequence, with b-ions marked in blue and y-ions in red. Amino acids with modifications are presented in red font. In case of the HYT cluster, only one of the six potential *O*-glycosylation sites is marked red.

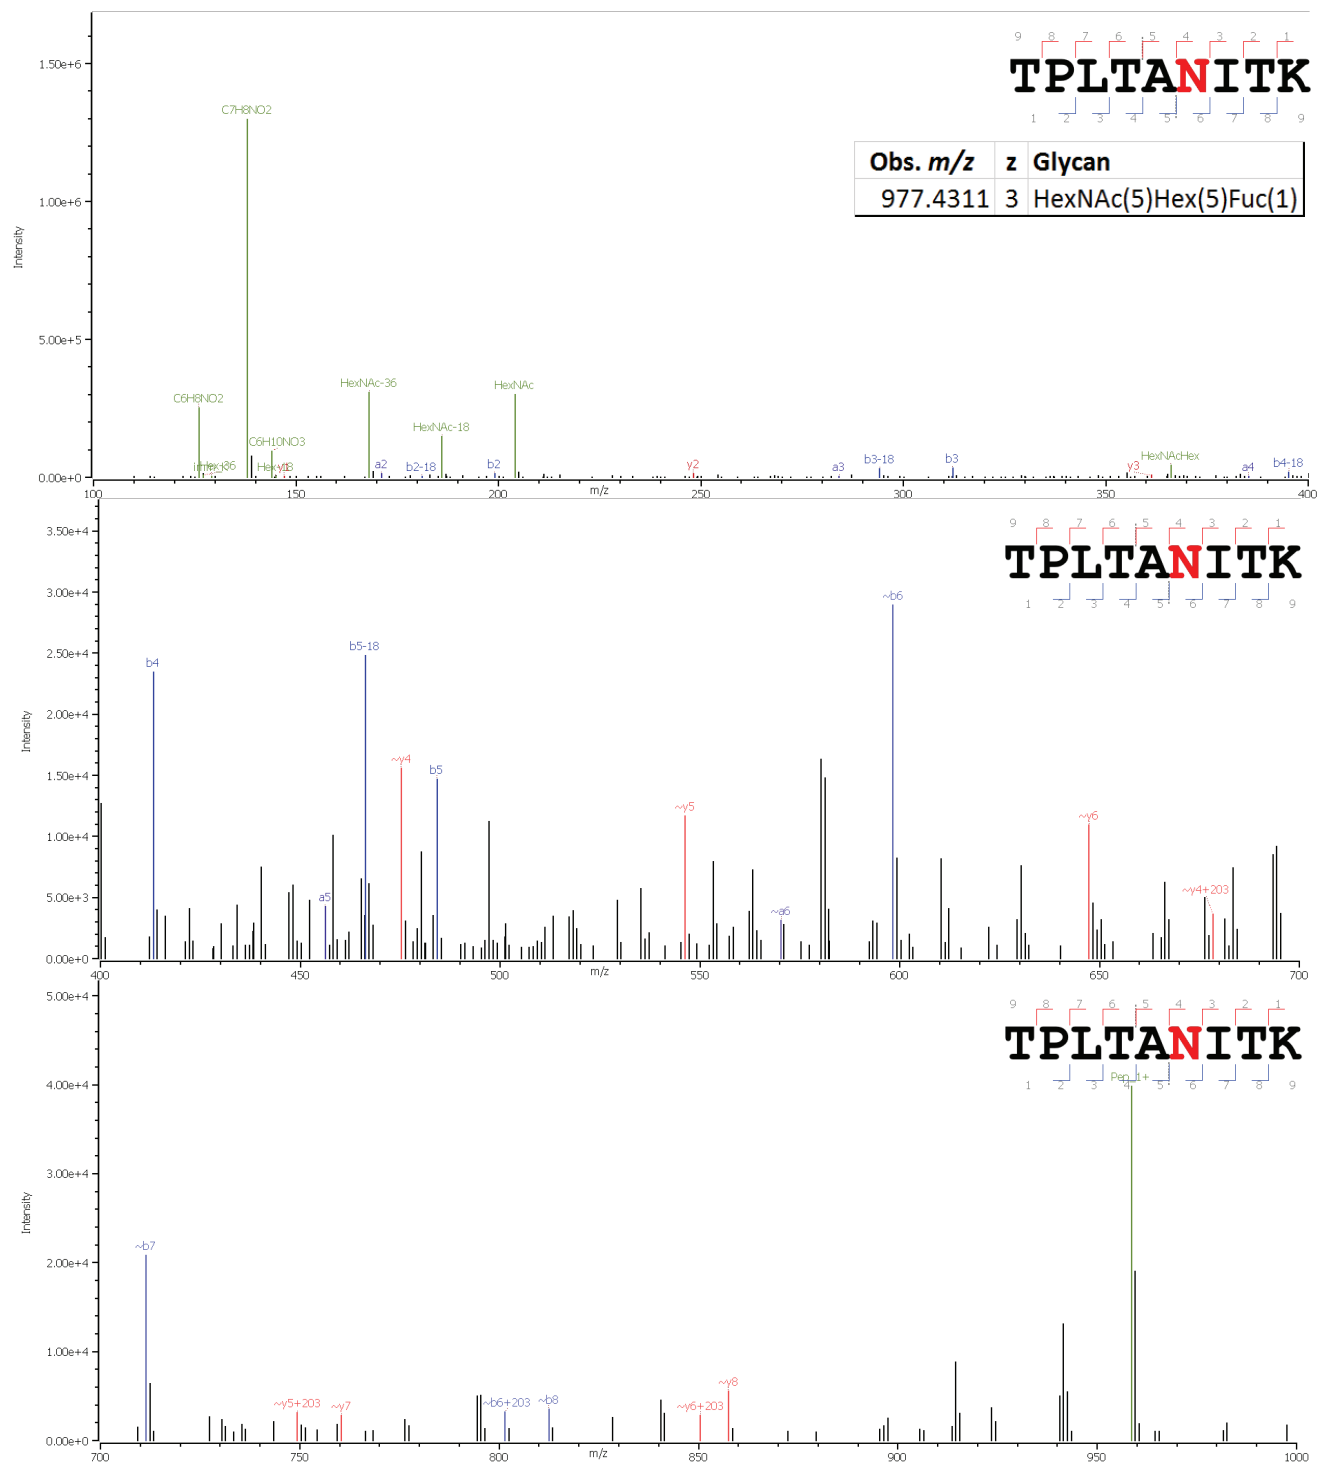

**Figure S1 Fragmentation spectra from HCD-MS/MS and Byonic software analysis**

Fragmentation spectra used for glycopeptide identification with Byonic were automatically annotated by the software. Each page contains one glycopeptide spectrum per cluster, divided in three separate *m/z* sections for better visibility; IgA1 HYT (Page 2), IgA1/2 LAGy (Page 3), IgA1/2 LAGc (Page 4), IgA1/2 LSL (Page 5), IgA2 TPL (Page 6), J-chain ENI (Page 7), J-chain IIV (Page 8), IgG1 (Page 9), IgG2/3 (Page 10), IgG4 (Page 11). The IgA2 SES cluster was not identified with this approach. In green are marked glycan-related peaks (Hex = hexose, HexNAc = *N*-acetylhexosamine, NeuAc = *N*-acetylneuraminic acid). The loss of one or two water molecules is marked with -18 and -36, respectively. The right top corner shows the amino acid sequence, with b-ions marked in blue and y-ions in red. Amino acids with modifications are presented in red font. In case of the HYT cluster, only one of the six potential *O*-glycosylation sites is marked red.

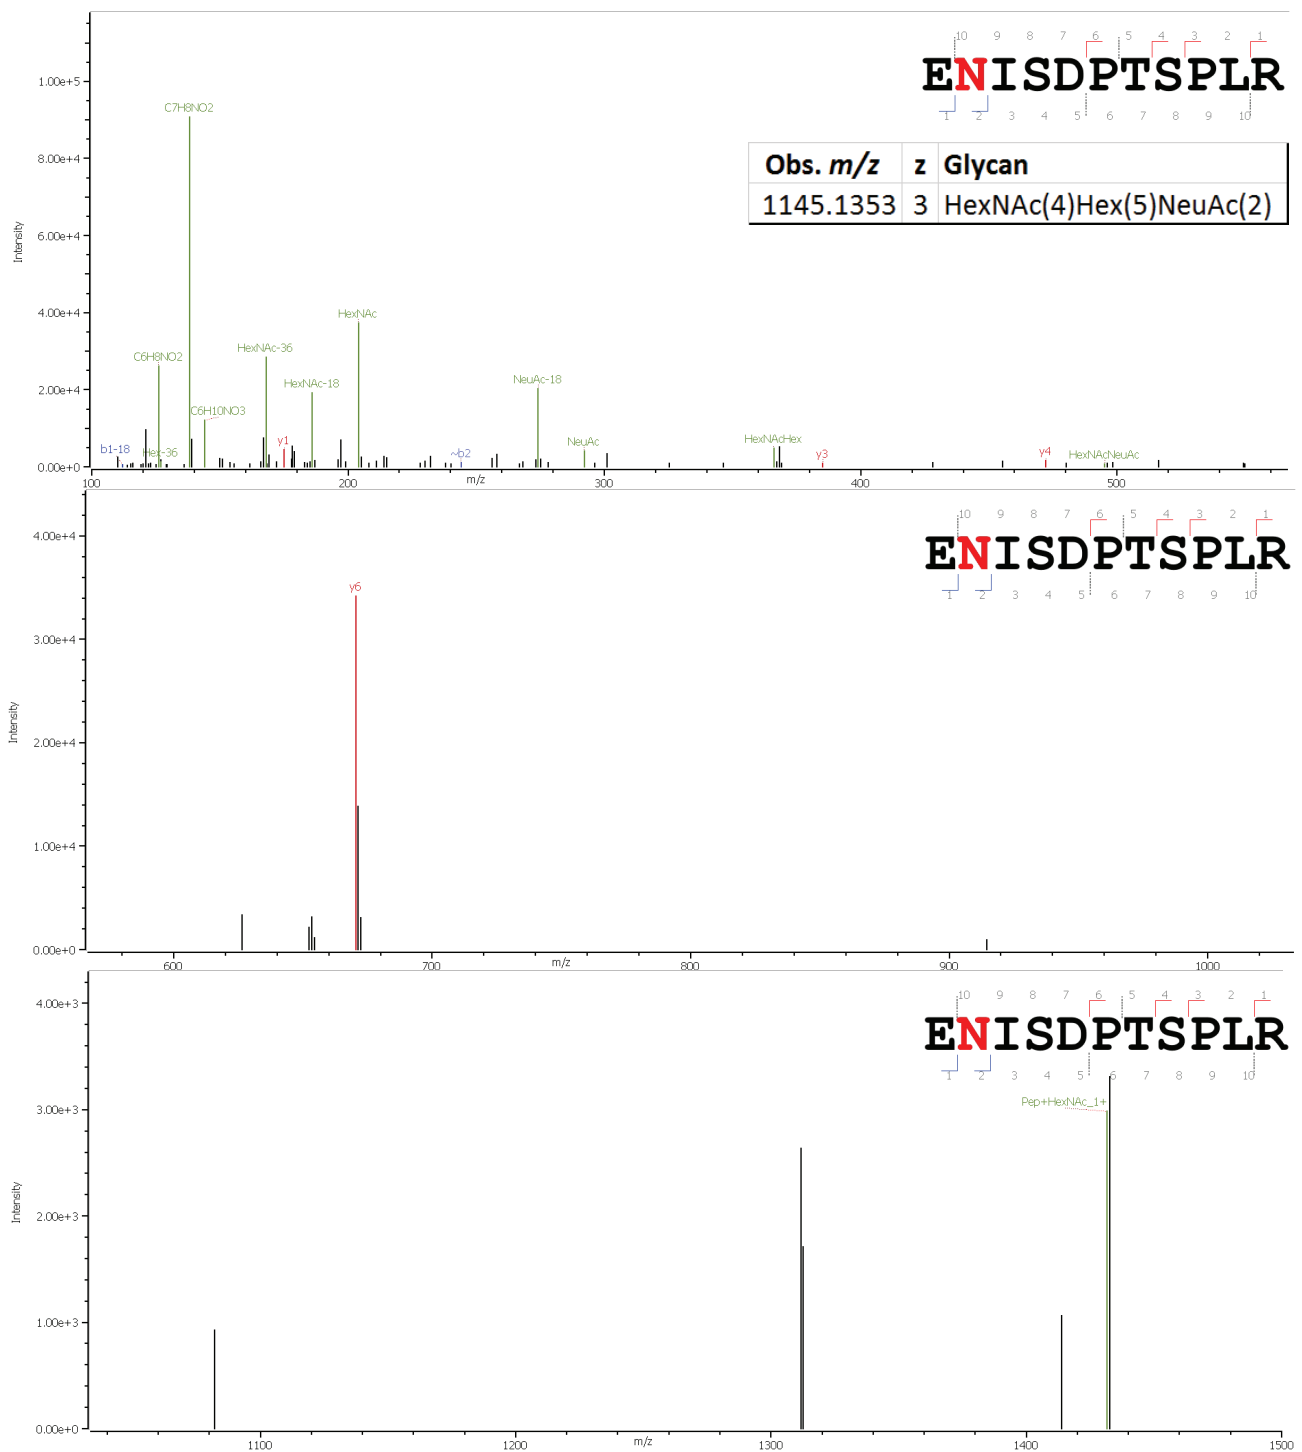

**Figure S1 Fragmentation spectra from HCD-MS/MS and Byonic software analysis**

Fragmentation spectra used for glycopeptide identification with Byonic were automatically annotated by the software. Each page contains one glycopeptide spectrum per cluster, divided in three separate *m/z* sections for better visibility; IgA1 HYT (Page 2), IgA1/2 LAGy (Page 3), IgA1/2 LAGc (Page 4), IgA1/2 LSL (Page 5), IgA2 TPL (Page 6), J-chain ENI (Page 7), J-chain IIV (Page 8), IgG1 (Page 9), IgG2/3 (Page 10), IgG4 (Page 11). The IgA2 SES cluster was not identified with this approach. In green are marked glycan-related peaks (Hex = hexose, HexNAc = *N*-acetylhexosamine, NeuAc = *N*-acetylneuraminic acid). The loss of one or two water molecules is marked with -18 and -36, respectively. The right top corner shows the amino acid sequence, with b-ions marked in blue and y-ions in red. Amino acids with modifications are presented in red font. In case of the HYT cluster, only one of the six potential *O*-glycosylation sites is marked red.

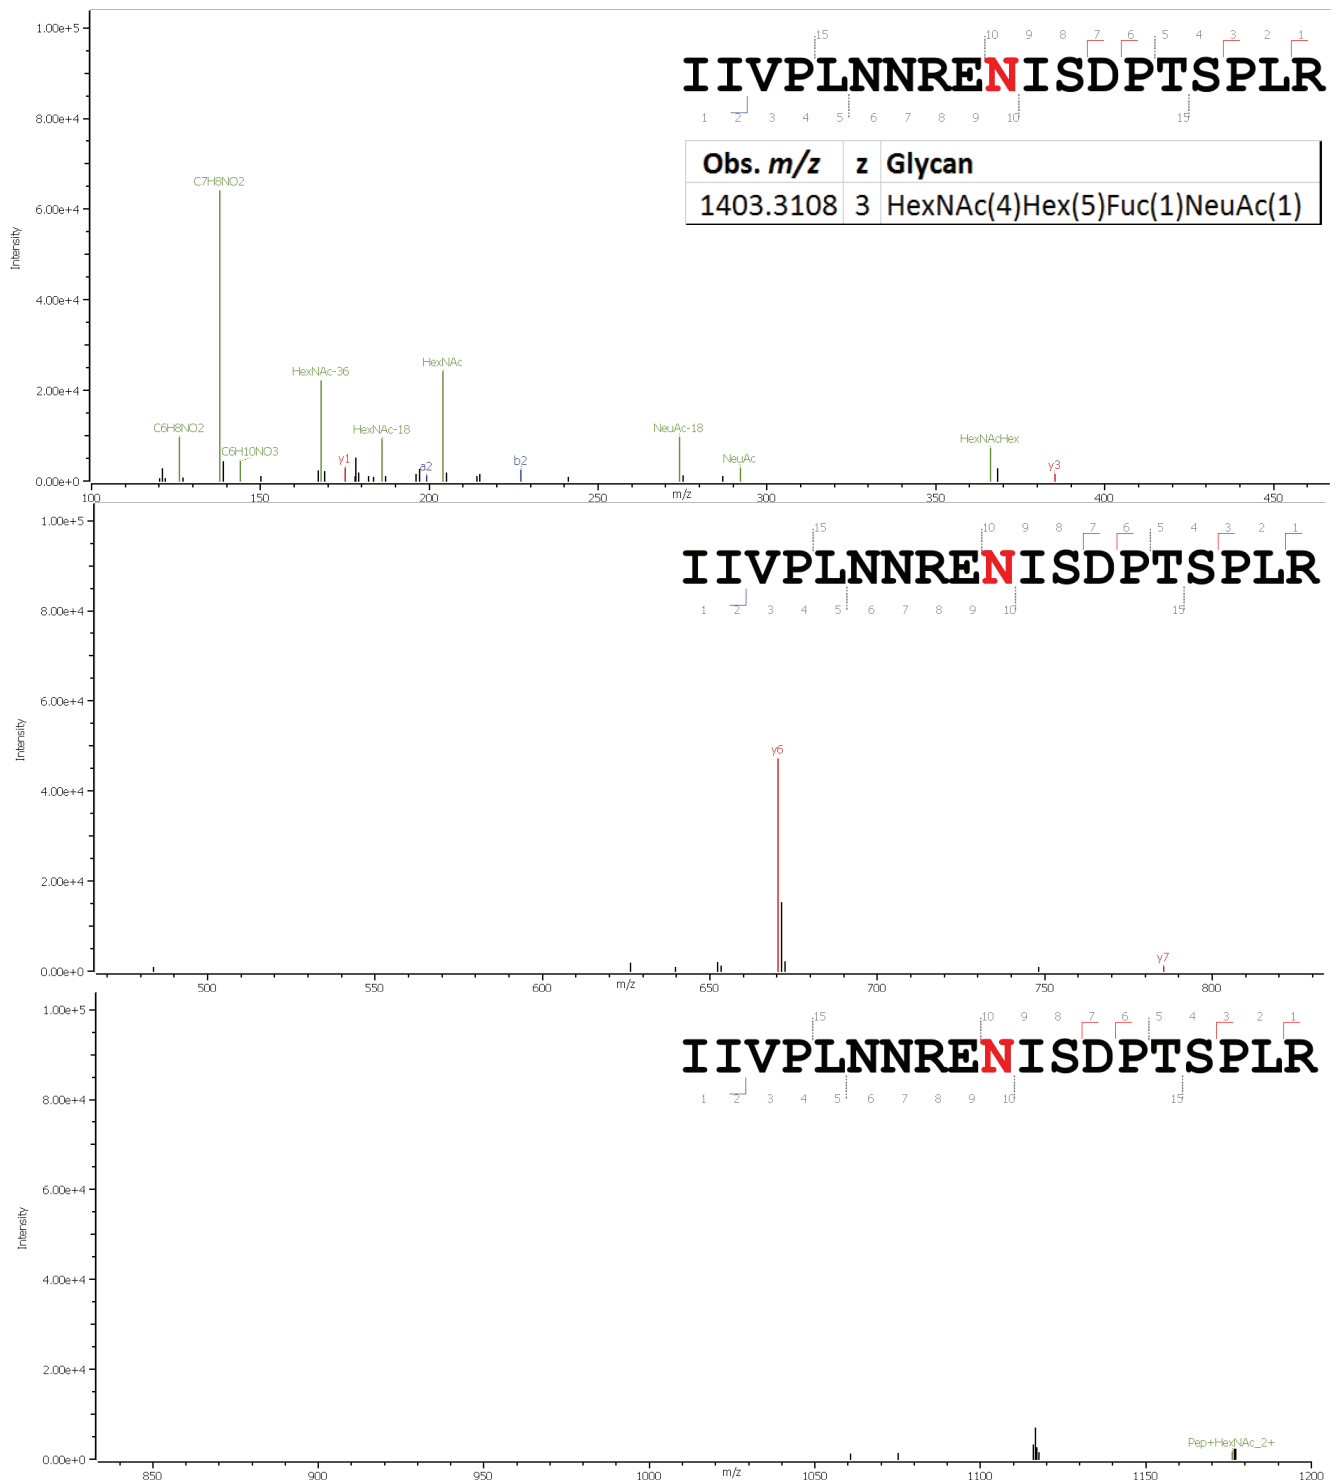

**Figure S1 Fragmentation spectra from HCD-MS/MS and Byonic software analysis**

Fragmentation spectra used for glycopeptide identification with Byonic were automatically annotated by the software. Each page contains one glycopeptide spectrum per cluster, divided in three separate *m/z* sections for better visibility; IgA1 HYT (Page 2), IgA1/2 LAGy (Page 3), IgA1/2 LAGc (Page 4), IgA1/2 LSL (Page 5), IgA2 TPL (Page 6), J-chain ENI (Page 7), J-chain IIV (Page 8), IgG1 (Page 9), IgG2/3 (Page 10), IgG4 (Page 11). The IgA2 SES cluster was not identified with this approach. In green are marked glycan-related peaks (Hex = hexose, HexNAc = *N*-acetylhexosamine, NeuAc = *N*-acetylneuraminic acid). The loss of one or two water molecules is marked with -18 and -36, respectively. The right top corner shows the amino acid sequence, with b-ions marked in blue and y-ions in red. Amino acids with modifications are presented in red font. In case of the HYT cluster, only one of the six potential *O*-glycosylation sites is marked red.



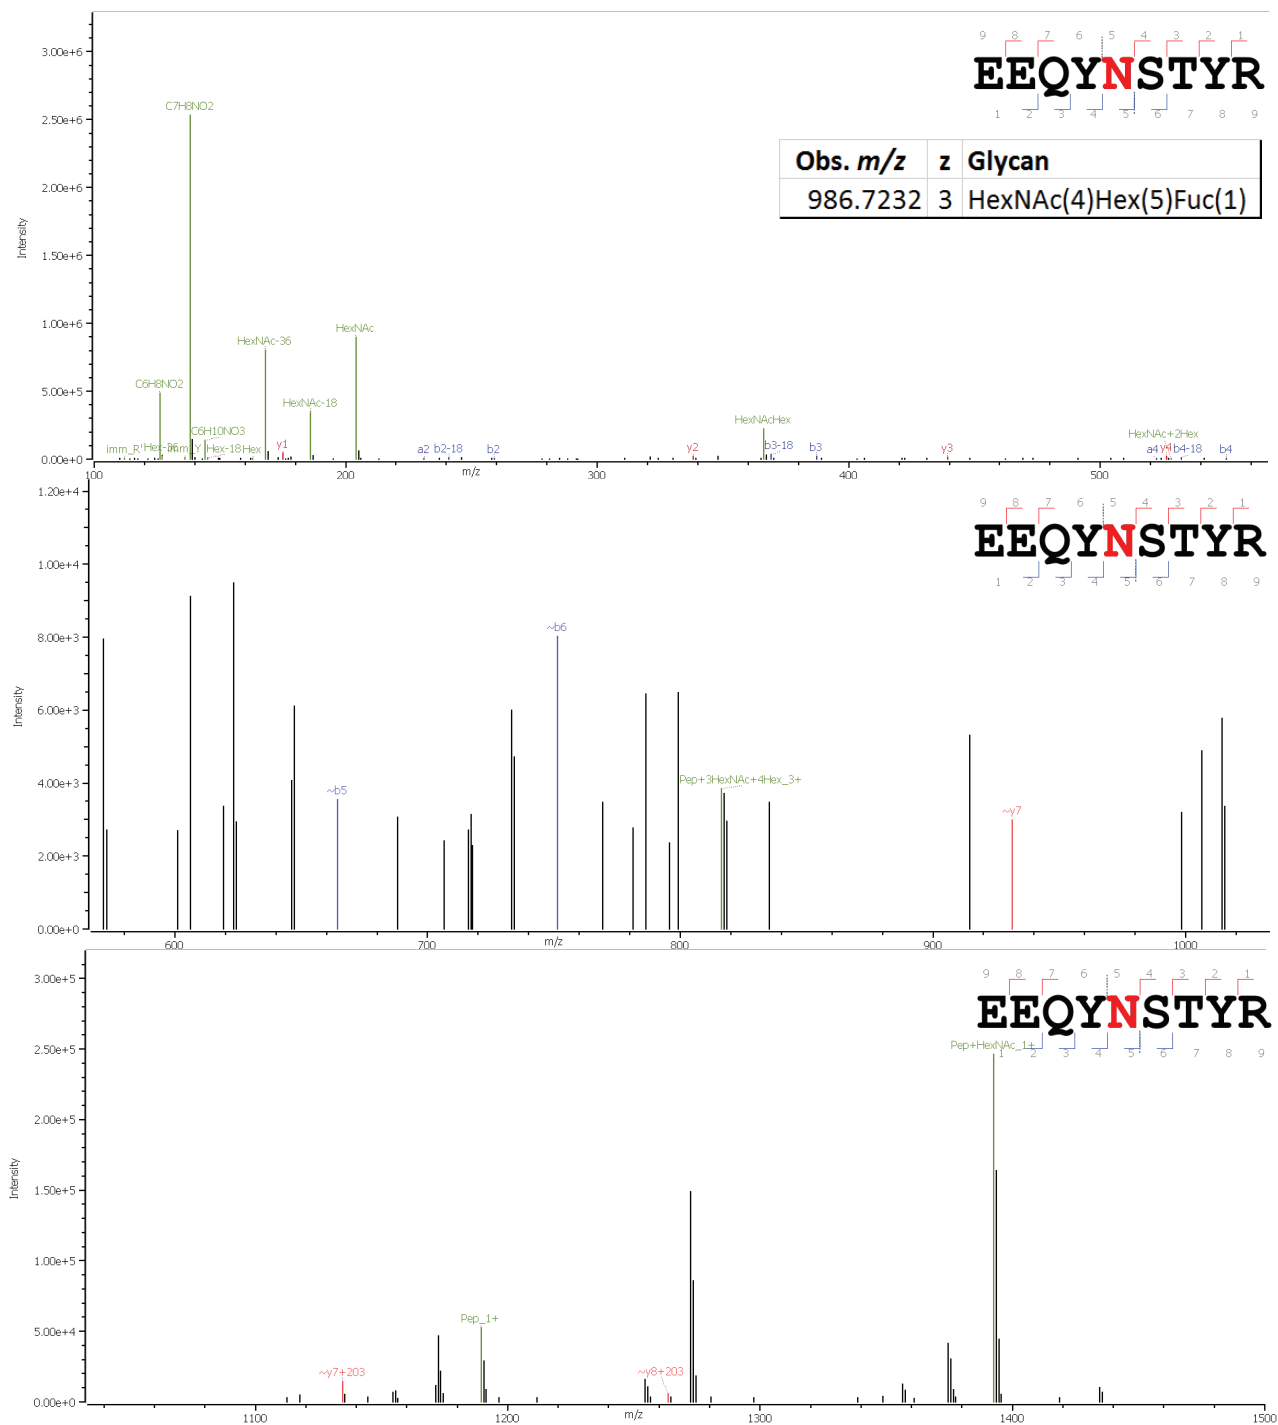

**Figure S1 Fragmentation spectra from HCD-MS/MS and Byonic software analysis**

Fragmentation spectra used for glycopeptide identification with Byonic were automatically annotated by the software. Each page contains one glycopeptide spectrum per cluster, divided in three separate *m/z* sections for better visibility; IgA1 HYT (Page 2), IgA1/2 LAGy (Page 3), IgA1/2 LAGc (Page 4), IgA1/2 LSL (Page 5), IgA2 TPL (Page 6), J-chain ENI (Page 7), J-chain IIV (Page 8), IgG1 (Page 9), IgG2/3 (Page 10), IgG4 (Page 11). The IgA2 SES cluster was not identified with this approach. In green are marked glycan-related peaks (Hex = hexose, HexNAc = *N*-acetylhexosamine, NeuAc = *N*-acetylneuraminic acid). The loss of one or two water molecules is marked with -18 and -36, respectively. The right top corner shows the amino acid sequence, with b-ions marked in blue and y-ions in red. Amino acids with modifications are presented in red font. In case of the HYT cluster, only one of the six potential *O*-glycosylation sites is marked red.

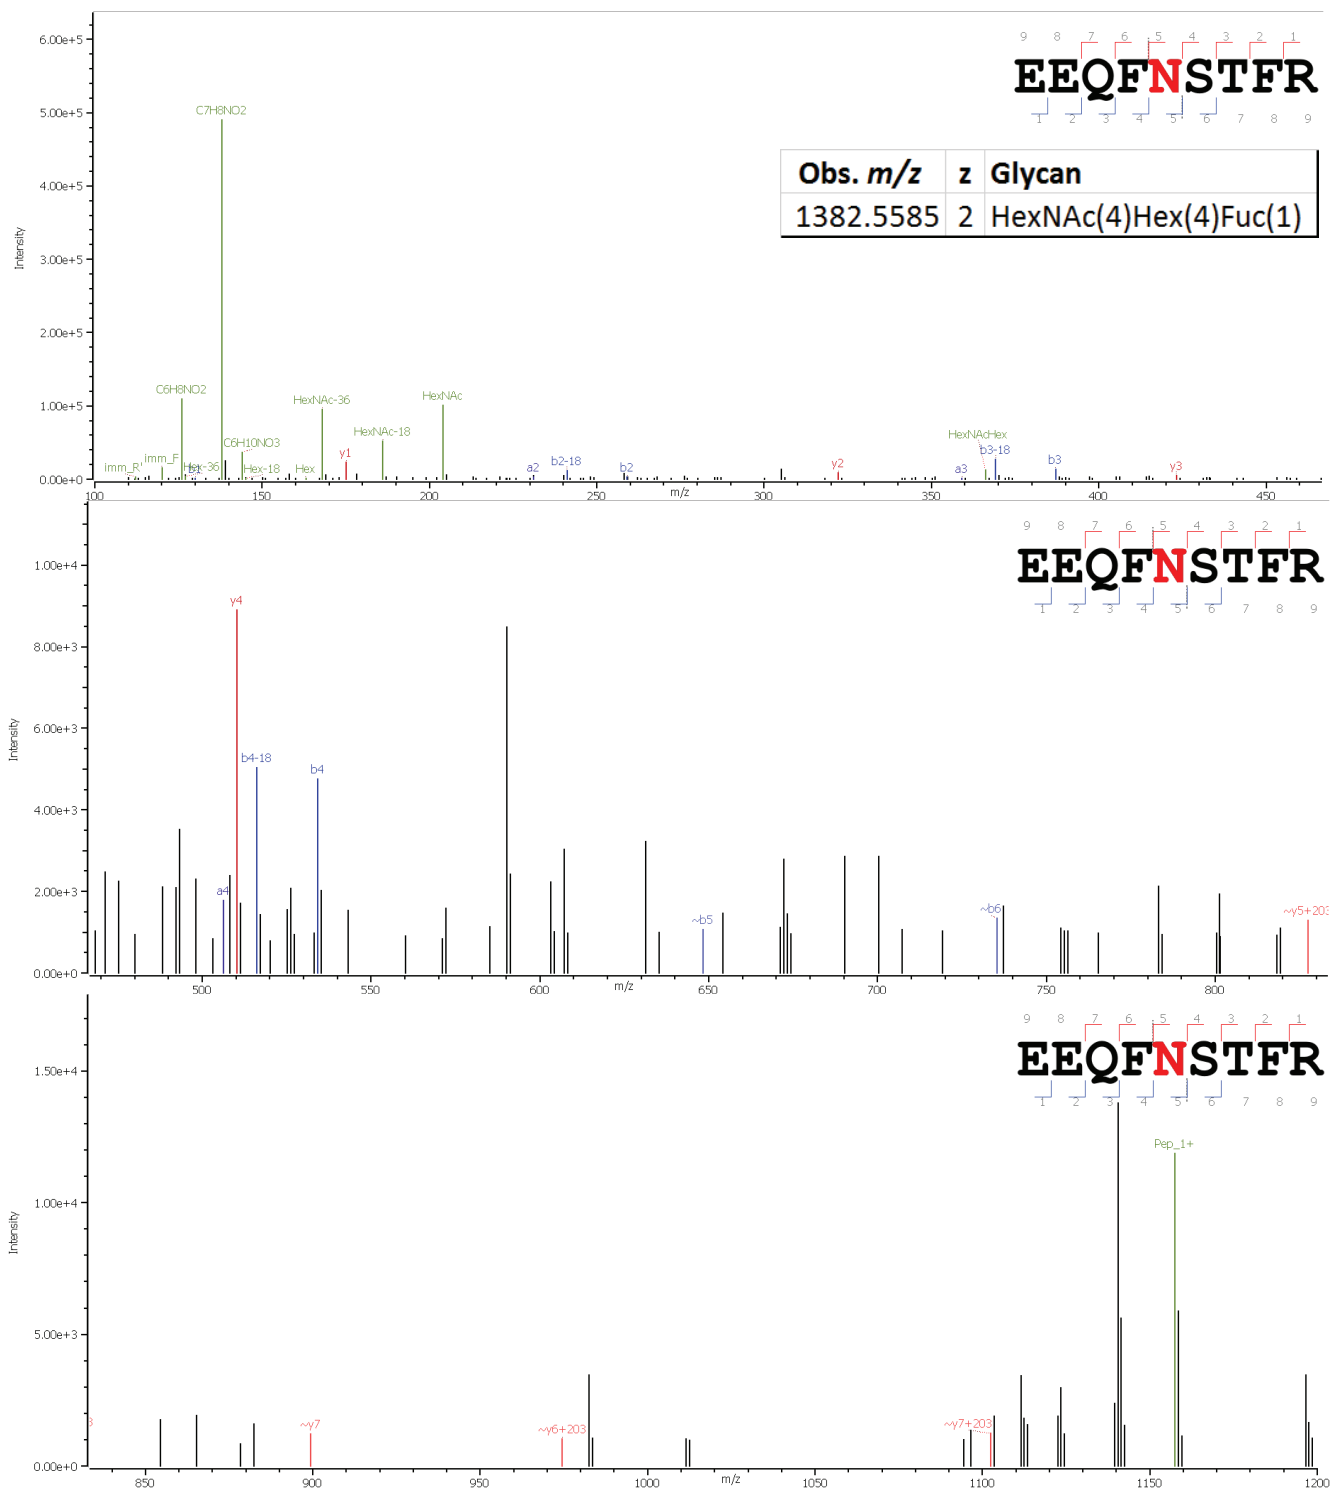

**Figure S1 Fragmentation spectra from HCD-MS/MS and Byonic software analysis**

Fragmentation spectra used for glycopeptide identification with Byonic were automatically annotated by the software. Each page contains one glycopeptide spectrum per cluster, divided in three separate *m/z* sections for better visibility; IgA1 HYT (Page 2), IgA1/2 LAGy (Page 3), IgA1/2 LAGc (Page 4), IgA1/2 LSL (Page 5), IgA2 TPL (Page 6), J-chain ENI (Page 7), J-chain IIV (Page 8), IgG1 (Page 9), IgG2/3 (Page 10), IgG4 (Page 11). The IgA2 SES cluster was not identified with this approach. In green are marked glycan-related peaks (Hex = hexose, HexNAc = *N*-acetylhexosamine, NeuAc = *N*-acetylneuraminic acid). The loss of one or two water molecules is marked with -18 and -36, respectively. The right top corner shows the amino acid sequence, with b-ions marked in blue and y-ions in red. Amino acids with modifications are presented in red font. In case of the HYT cluster, only one of the six potential *O*-glycosylation sites is marked red.

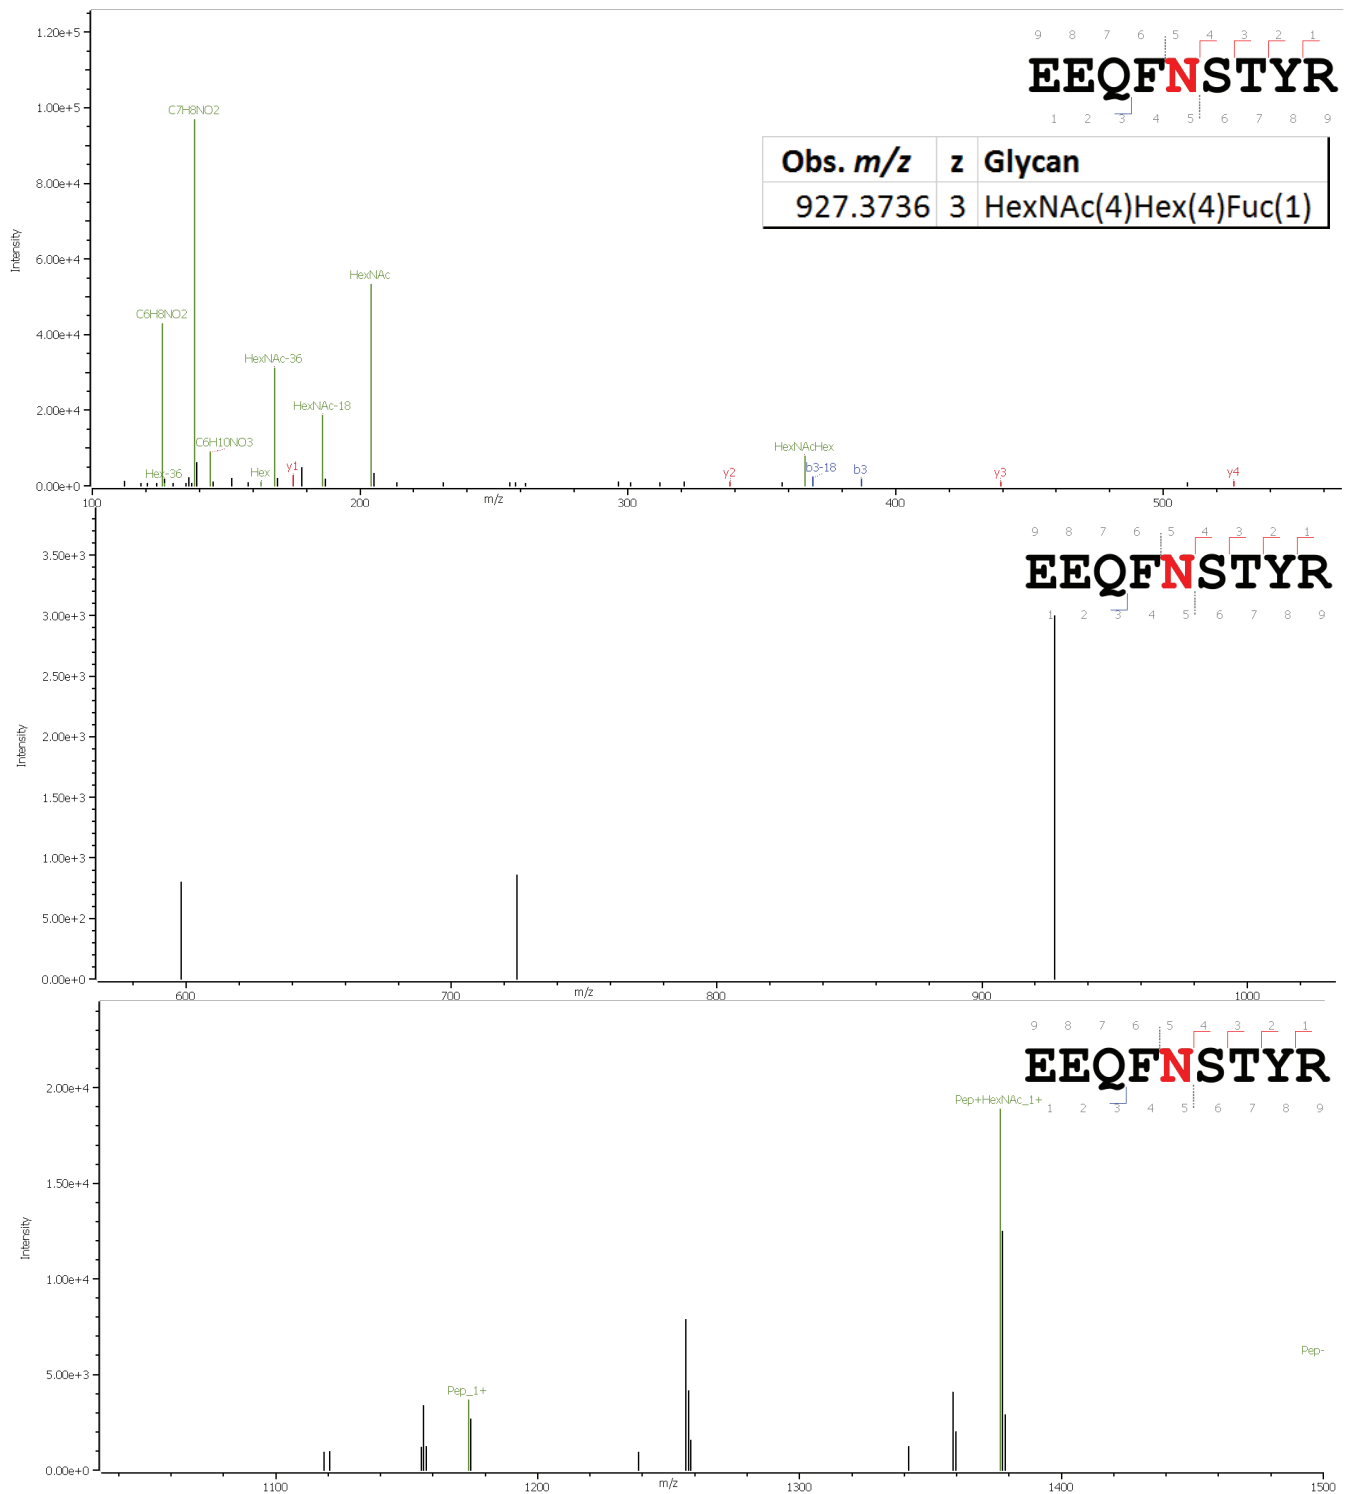

**Figure S1 Fragmentation spectra from HCD-MS/MS and Byonic software analysis**

Fragmentation spectra used for glycopeptide identification with Byonic were automatically annotated by the software. Each page contains one glycopeptide spectrum per cluster, divided in three separate *m/z* sections for better visibility; IgA1 HYT (Page 2), IgA1/2 LAGy (Page 3), IgA1/2 LAGc (Page 4), IgA1/2 LSL (Page 5), IgA2 TPL (Page 6), J-chain ENI (Page 7), J-chain IIV (Page 8), IgG1 (Page 9), IgG2/3 (Page 10), IgG4 (Page 11). The IgA2 SES cluster was not identified with this approach. In green are marked glycan-related peaks (Hex = hexose, HexNAc = *N*-acetylhexosamine, NeuAc = *N*-acetylneuraminic acid). The loss of one or two water molecules is marked with -18 and -36, respectively. The right top corner shows the amino acid sequence, with b-ions marked in blue and y-ions in red. Amino acids with modifications are presented in red font. In case of the HYT cluster, only one of the six potential *O*-glycosylation sites is marked red.

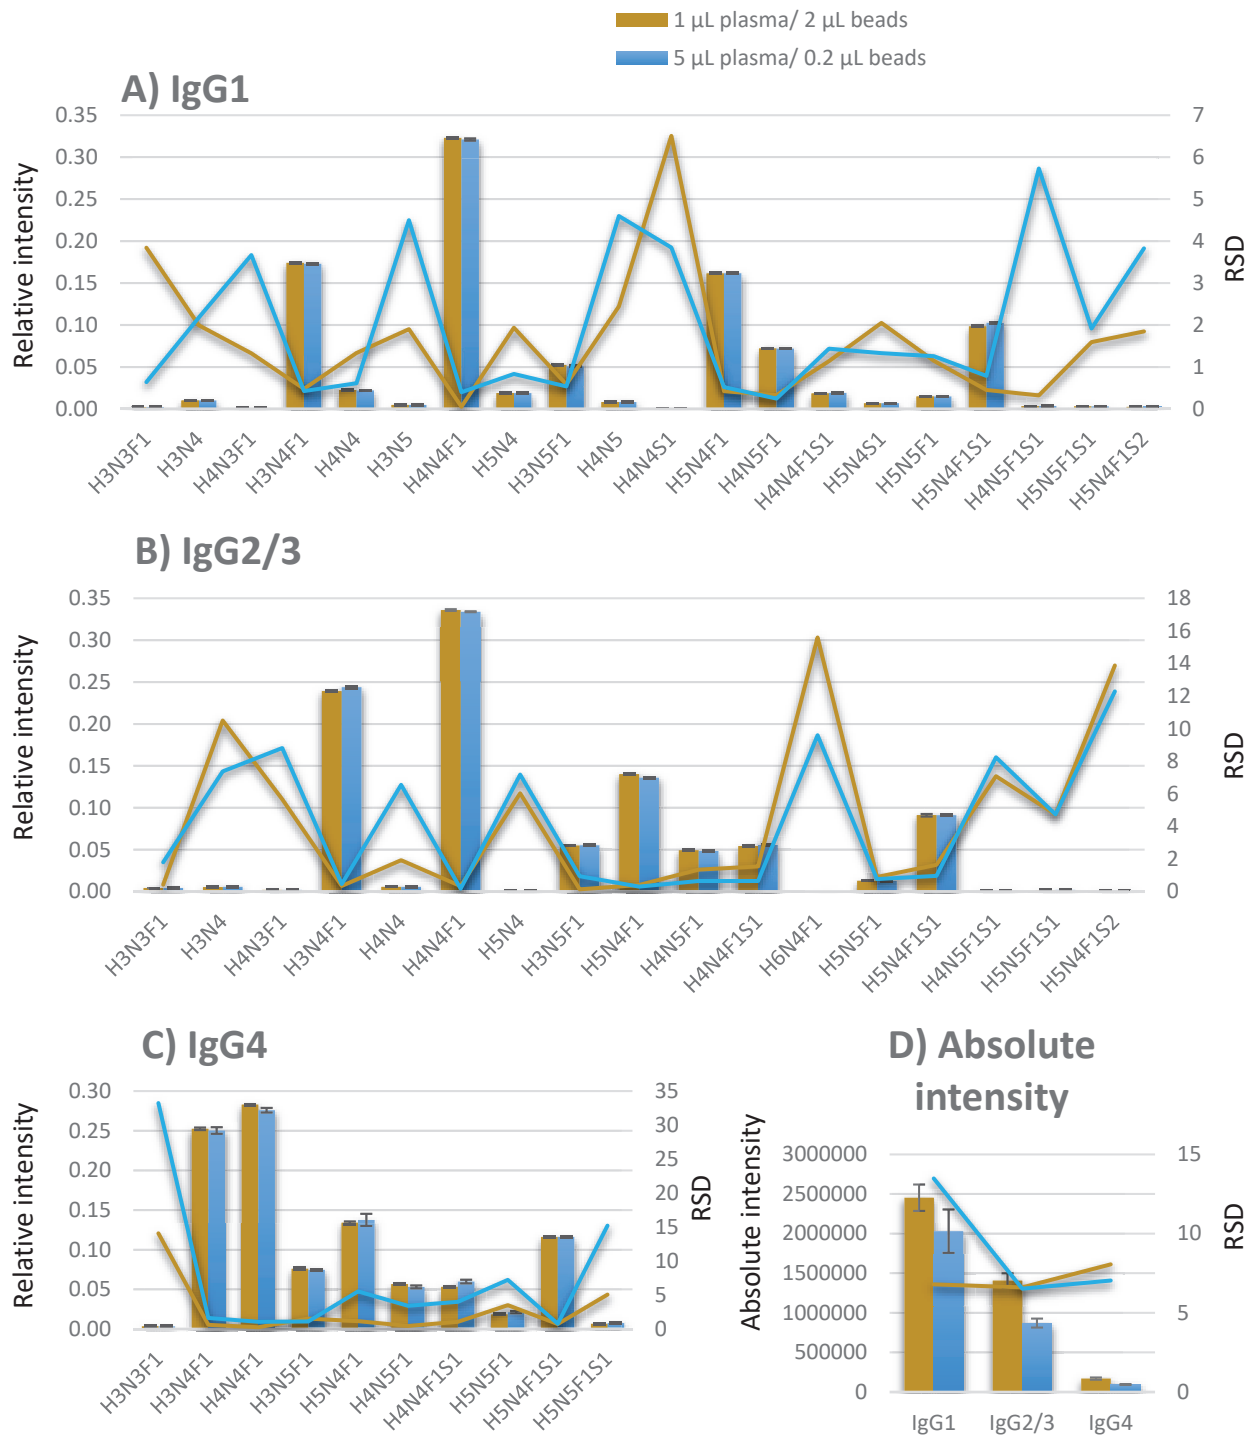

**Figure S2 IgG glycosylation profiles and absolute intensities at different capturing conditions.**

Total IgG was captured either with high (brown) or low (blue) recovery and plotted for the different subclasses IgG1 (A), IgG2/3 (B), and IgG4 (C). Absolute intensities of IgG glycopeptides are reduced due to undercapturing (D). Error bars (standard deviation) and respective relative standard deviations (RSD) are calculated from triplicate samples that went through the entire workflow as described in the Methods section, with the exception of the amount of plasma and beads used for the high-recovery capturing, i.e. 1 μL plasma with 2 μL beads.

Non-fucosylated glycopeptide species in IgG4 were not included here due to their overlapping *m/z* values with respective fucosylated IgG1 species. H = hexose, N = *N*-acetylhexosamine, F = fucose, S = *N*-acetylneuraminic acid.

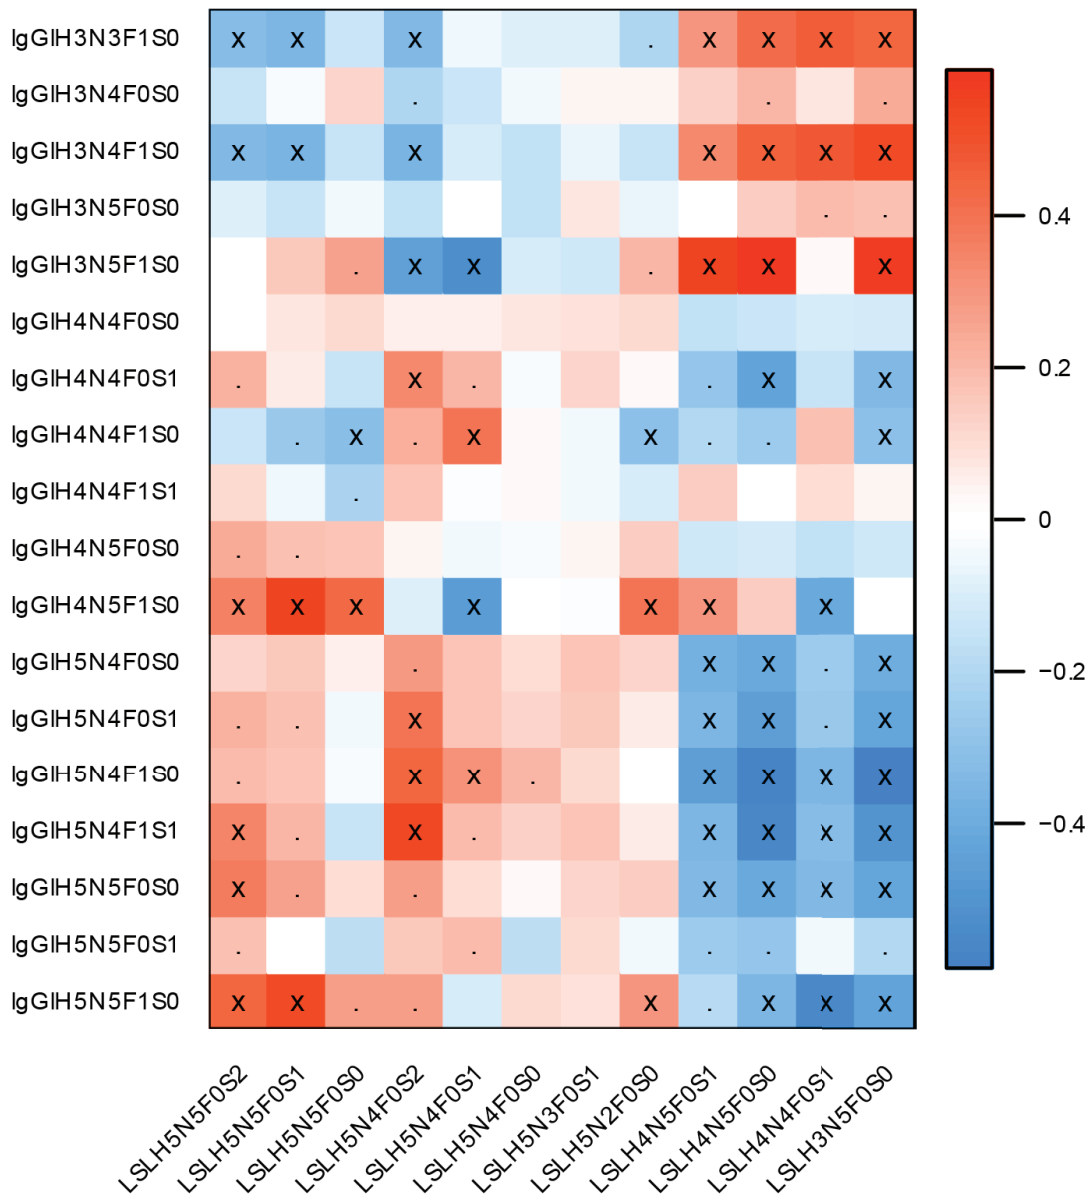

**Figure S3 Correlation heatmap of IgG1 and IgA1/2 LSL glycopeptides**

Spearman correlation coefficients are depicted as indicated in the color legend. Dots (.) indicate a statistical significance of  $p \leq 0.05$  while crosses (X) mark significance of  $p \leq 1.6 \times 10^{-3}$  which is the Bonferroni corrected threshold.
